# Supplementary material
Source: publisher figshare collection journal article supplement (https://acs.figshare.com/ndownloader/files/4687651)
Supplement: Supplementary file 1 [file 4687651]

**Supporting Information for**

**Biomimetic growth of biomorphic CaCO3 with hierarchically ordered cellulosic structures**

Zhi Zheng*, †‡, Baojun Huang†, Huiqiang Ma†, Xiaoping Zhang†, Manying Liu†, Zhuang Liu‡, Ka Wai Wong‡ and Woon Ming Lau *,‡δ

†Institute of Surface Micro and Nano Materials, Xuchang University, Xuchang, Henan Province, 461000, China.

‡Department of Physics, The Chinese University of Hong Kong, Shatin, Hong Kong, P.R. China.

δSurface Science Western, The University of Western Ontario, London, Ontario, Canada.

Fax: 86-374-4369209; Tel: 86-374-4369209;

*Address correspondence to these authors. E-mail: [*zhengzhi9999@yahoo.com.cn*](mailto:zhengzhi9999@yahoo.com.cn), [*llau22@uwo.ca*](mailto:llau22@uwo.ca)

**Figure S1** SEM morphologies of (a) virgin cotton templates and (b) the fresh prepared sample prior to calcinations.


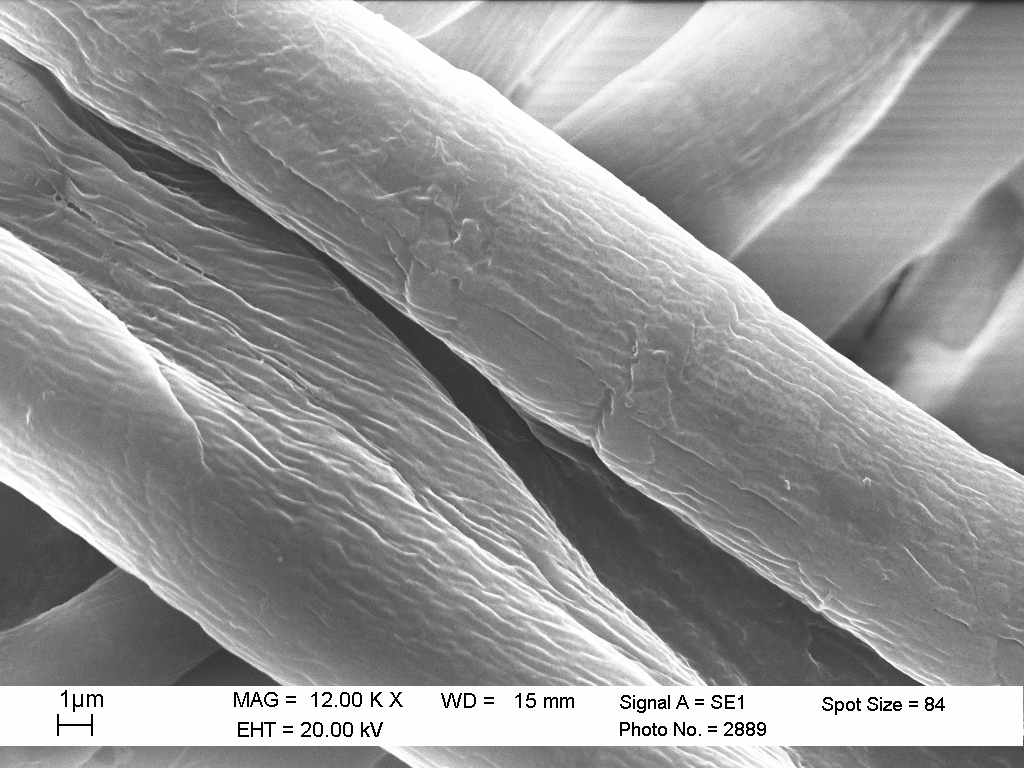


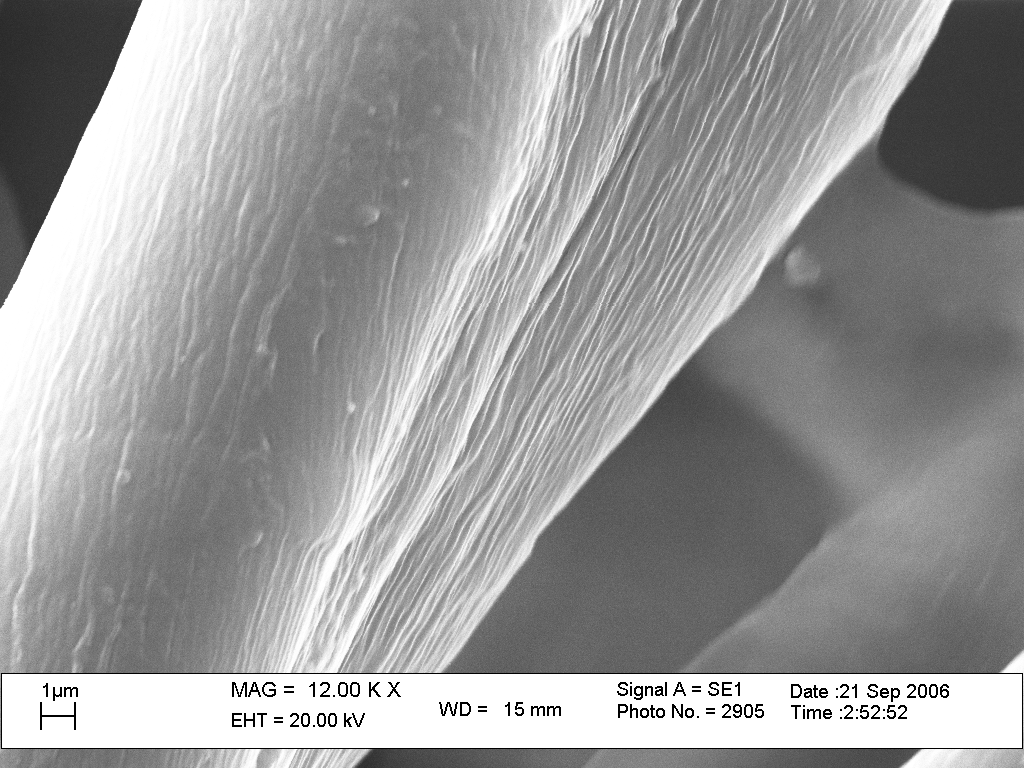


**Figure S2** XPS survey spectrum of the typical “cloth CaCO3” prior to calcinations.
